## RESEARCH ARTICLE

# Local thermal environment and warming influence supercooling and drive widespread shifts in the metabolome of diapausing *Pieris rapae* butterflies

Emily E. Mikucki\* and Brent L. Lockwood\*

## ABSTRACT

Global climate change has the potential to negatively impact biological systems as organisms are exposed to novel temperature regimes. Increases in annual mean temperature have been accompanied by disproportionate rates of change in temperature across seasons, and winter is the season warming most rapidly. Yet, we know relatively little about how warming will alter the physiology of overwintering organisms. Here, we simulated future warming conditions by comparing diapausing *Pieris rapae* butterfly pupae collected from disparate thermal environments and by exposing *P. rapae* pupae to acute and chronic increases in temperature. First, we compared internal freezing temperatures (supercooling points) of diapausing pupae that were developed in common-garden conditions but whose parents were collected from northern Vermont, USA, or North Carolina, USA. Matching the warmer winter climate of North Carolina, North Carolina pupae had significantly higher supercooling points than Vermont pupae. Next, we measured the effects of acute and chronic warming exposure in Vermont pupae and found that warming induced higher supercooling points. We further characterized the effects of chronic warming by profiling the metabolomes of Vermont pupae via untargeted LC-MS metabolomics. Warming caused significant changes in abundance of hundreds of metabolites across the metabolome. Notably, there were warming-induced shifts in key biochemical pathways, such as pyruvate metabolism, fructose and mannose metabolism, and  $\beta$ -alanine metabolism, suggesting shifts in energy metabolism and cryoprotection. These results suggest that warming affects various aspects of overwintering physiology in *P. rapae* and may be detrimental depending on the frequency and variation of winter warming events. Further research is needed to ascertain the extent to which the effects of warming are felt among a broader set of populations of *P. rapae*, and among other species, in order to better predict how insects may respond to changes in winter thermal environments.

**KEY WORDS:** Cold tolerance, Climate change, Diapause, Cryoprotectant, Metabolomics, Overwintering

## INTRODUCTION

Climate change will expose organisms to unpredictable thermal environments to which they may not be adapted through shifts in

seasonality (i.e. later onset of winter and/or earlier onset of spring) and the increased frequency of temperature anomalies (Buckley and Kingsolver, 2012; García-Robledo et al., 2016; Sinclair et al., 2016; Somero, 2010; Somero et al., 2017). Mean atmospheric winter temperatures are increasing at a faster rate than temperatures in any other season (Allen et al., 2019). According to the latest IPCC special report, winter temperatures have shown increased variability with both hotter mean temperatures and a lower frequency of days below freezing (Allen et al., 2019). Thus, it is imperative to characterize how overwintering organisms respond to warming conditions in order to predict how these species will respond to the future climate.

Diapause is an overwintering strategy for temperate insects, and relies on intrinsic physiological mechanisms (Ragland and Keep, 2017; Ragland et al., 2011) that depress metabolic activity, arrest development, and confer cold and stress tolerance (Košťál, 2006; Košťál et al., 2017). A key trait that underlies cold tolerance during diapause is supercooling (Lee, 2010; Sinclair et al., 2015), a freeze-avoidance strategy in which body solutions can drop below the melting point of an organism without the formation of ice (Somero et al., 2017). Ice formation is detrimental, particularly when it occurs inside cells, because of the volume expansion of freezing aqueous solutions (Somero et al., 2017). Supercooling is achieved by various biochemical mechanisms that work in concert, such as cryoprotectant metabolites that reduce the freezing point via colligative properties (Košťál et al., 2007), antifreeze proteins and glycolipids that hinder the formation and spread of ice crystals (Duman, 2015), and cryoprotective dehydration that decreases the potential for body water to freeze by increasing the concentration of cryoprotectant metabolites and antifreeze (Walters et al., 2011). For example, one of the lowest supercooling points was reported in larvae of the arctic beetle *Cucujus clavipes*, which can supercool to  $-58^{\circ}\text{C}$  via the synthesis and accumulation of high concentrations of glycerol ( $4\text{--}6\text{ mol l}^{-1}$ ) (Sforno et al., 2010). Vitrification, the conversion of intracellular and extracellular water into solid-state vitreous water that does not expand in volume, is yet another mechanism of freeze avoidance that enables *C. clavipes* larvae to survive temperatures down to  $-100^{\circ}\text{C}$  (Sforno et al., 2010).

In addition to the intrinsic physiological mechanisms that enable diapausing insects to survive through months of extreme winter conditions, extrinsic factors such as temperature may also influence overwintering. The Arrhenius relationship (i.e. the  $Q_{10}$  effect) predicts that increases in temperature will lead to exponential increases in the rate of biochemical reactions (Somero et al., 2017). Thus, if dormant animals rely on cold temperatures as a means to extrinsically regulate and depress the rate of their physiological processes (Geiser, 2004; Hodek and Hodková, 1988; Snapp and Heller, 1981; Storey and Storey, 2010), warming could lead to increases in biochemical activity that alter development rate (Buckley

Department of Biology, University of Vermont, Burlington, VT 05405, USA.

\*Authors for correspondence (Emily.Mikucki@uvm.edu; Brent.Lockwood@uvm.edu)

 E.E.M., 0000-0002-1906-1247; B.L.L., 0000-0003-4694-5897

Received 6 July 2021; Accepted 21 October 2021

et al., 2017), deplete energy reserves (Sgolastra et al., 2011; Williams et al., 2012) and hinder cold tolerance (Coleman et al., 2014; Sobek-Swant et al., 2012). Notably, cryoprotectants can be used as fuel sources (Sinclair, 2015; Sinclair and Marshall, 2018; Storey and Storey, 1986), which could directly impact cold tolerance as warming increases energetic demand. Furthermore, insects may be particularly vulnerable to the increased thermal variability (Colinet et al., 2015; Sinclair et al., 2016) that accompanies winter warming (Allen et al., 2019), as even subtle changes in temperature can have adverse effects on diapause development and subsequent spring eclosion success (Lehmann et al., 2018). As further evidence that winter warming could impact overwintering physiology in insects, many studies have reported evidence of local adaptation of cold tolerance that correlates with local thermal environments (Arambourou and Robby, 2015; Bradshaw et al., 2004; Hoffmann et al., 2005; Kukul and Duman, 1989; Nguyen et al., 2019; Preisser et al., 2008; Vrba et al., 2014), suggesting that warmer winters will lead to evolutionary responses in overwintering physiological traits that support cold tolerance and ultimately influence fitness.

While previous work has established connections between the thermal environment and overwintering physiology in various insects, the extent to which changes in temperature influence the molecular underpinnings of overwintering physiology, such as the metabolome, has not been fully explored. Much of the work to uncover the molecular physiological basis of overwintering physiology in insects has employed targeted metabolomics to profile candidate molecules that are known to play a role in overwintering physiology, such as various cryoprotectants (Colinet et al., 2016; Košťál et al., 2007, 2011, 2016; Lehmann et al., 2018; Michaud and Denlinger, 2007). These candidate metabolomics studies have contributed important discoveries that enhance our understanding of the molecular basis of diapause and overwintering physiology in insects, but more studies are needed to expand upon this work to include broader surveys that use untargeted metabolomics (see Chen et al., 2021; MacMillan et al., 2016; Williams et al., 2014a). In particular, untargeted metabolomics can be employed in order to limit the ascertainment bias that is inherent in candidate metabolite studies (Feder and Walsler, 2005) and ultimately provide a more comprehensive picture of complex molecular physiological processes.

To address this gap in our knowledge, we investigated thermal effects on supercooling and the metabolome of North American *Pieris rapae* butterflies, which diapause and overwinter in the pupal stage (Richards, 1940). *Pieris rapae*, or the cabbage white butterfly, is a globally abundant insect species that has a broad distribution that spans thermal gradients across five continents (Ryan et al., 2019). Previous work has shown that populations of *P. rapae* from locations with different winter climates have distinct cold tolerance strategies, i.e. freeze avoidance versus freeze tolerance (Li et al., 2020; Li and Averenskii, 2007; Sømme, 1982). *Pieris rapae* from North America and Europe are freeze avoidant (Li et al., 2020; Sømme, 1982), whereas *P. rapae* from eastern Siberia are freeze tolerant (Li et al., 2020; Li and Averenskii, 2007). This suggests that the thermal environment influences various aspects of *P. rapae* overwintering physiology, but also highlights the importance of considering ecological relevance when investigating the physiological mechanisms that underlie cold tolerance. Thus, we first sought to confirm the ecological relevance of supercooling in North American *P. rapae* by comparing the supercooling points of diapausing *P. rapae* that were collected from disparate thermal environments in northern Vermont and North Carolina, USA. Because North American *P.*

*rapae* have been shown to be freeze avoidant (Li et al., 2020), we predicted that the ability to supercool would correlate with the local thermal environments in Vermont and North Carolina. We note that supercooling is but one aspect of cold tolerance and may not fully describe fitness or survival in response to cold stress (Lehmann et al., 2018). Nonetheless, supercooling is a critical trait for freeze avoidant insects and, thus, we use it as a proxy for cold tolerance in the present study. Next, we tested whether acute (hours) or chronic (weeks) increases in temperature influence supercooling in Vermont *P. rapae* pupae. Lastly, we conducted untargeted LC-MS metabolomics to characterize the metabolomic profiles of Vermont *P. rapae* pupae that were exposed to chronic warming. We measured metabolomic profiles of Vermont pupae for which we also measured supercooling points, allowing us to correlate metabolomes to supercooling.

Our experiments were designed to assess the relative effects of predicted near-term future increases in temperature on overwintering physiology; the difference in winter temperatures in Vermont and North Carolina, and the degree to which pupae were exposed to increased temperature, approximate the extent of warming that is predicted to occur in Vermont in the next century, if current trends continue (Fig. 1). We predicted that (1) pupae would exhibit supercooling points that reflected the thermal environment of their population of origin, (2) higher temperature during diapause would adversely affect supercooling capacity, and (3) warming would induce changes in metabolite abundance across the metabolome. Overall, our results suggest that overwintering physiology in diapausing *P. rapae* is strongly influenced by temperature and that winter warming may have important consequences for the ecological physiology of this species.

## MATERIALS AND METHODS

### Adult butterfly collections and maintenance

For population comparisons, we collected adult *Pieris rapae* (Linnaeus 1758) butterflies in mid to late September 2017 at two locations in northwestern Vermont (44.496811, -73.205608 and 44.286131, -73.235308) and from two locations in North Carolina (35.605408, -82.335347 and 35.608769, -82.442036). After

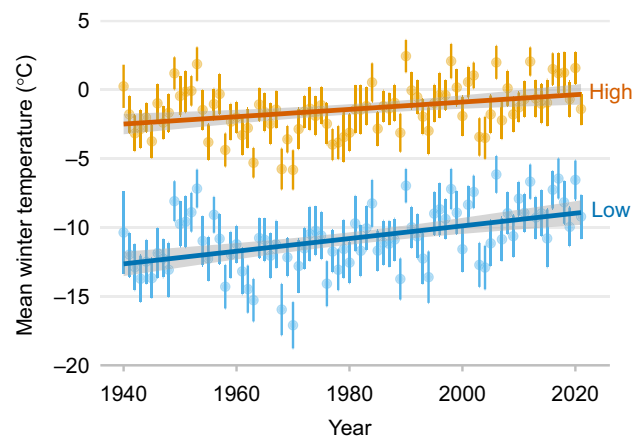

**Fig. 1. Winter temperature trends in Burlington, VT, USA, from 1940 to 2021.** Plotted are mean daily high and low temperatures, averaged over December, January and February for each year. Both daytime highs and daytime lows are warmer now than they were 80 years ago (least-squares linear regression; high,  $R^2=0.11$ ,  $P=0.0013$ ,  $y=0.027x-54.15$ ; low,  $R^2=0.22$ ,  $P=0.0000065$ ,  $y=0.046x-101.8$ ). Error bars and error bands indicate 95% confidence intervals.

collection, we kept adults in mesh containers (Carolina Biological Supply, 11 inch diameter×12 inch height, ~28×30 cm) with 10 butterflies in each container under common garden conditions of 24°C, 12 h:12 h light:dark photoperiod, 55% relative humidity, and with direct access to sunlight. We fed adults a diet of 10% honey solution on a sponge every 24 h. Adults were allowed to mate *en masse* in order to generate as many offspring as possible. Then, 48 h post-collection, we isolated females in mesh containers, and provided them with fresh, organic kale leaves on which to oviposit. Fertilized eggs were collected every 24 h, and placed into common-garden juvenile rearing conditions.

### Juvenile stage rearing and diapause induction

*Pieris rapae* diapause in the pupal stage, with the larval stage as the sensitive, or preparative, stage (Richards, 1940). To ensure all individuals entered diapause, we subjected all individuals to short-day photoperiods (8 h light:16 h dark) upon oviposition. Eggs were collected and randomly assigned to treatment groups, and placed into plastic containers (35.6 cm×20.3 cm×12.4 cm L×W×H) in incubators (Percival model DR-36VL) set to 24°C and 55% relative humidity, with approximately 20 eggs in each container. We provided larvae with fresh organic kale leaves daily. Because of space limitations inside of our incubators, egg clutches from multiple females were reared together. Thus, we could not test for maternal effects on supercooling point. Upon pupation, roughly 14 days post-oviposition, we placed all individuals into Petri dishes (60×15 mm), then assigned them to one of three temperature treatments (described below).

### Temperature treatments of diapausing pupae

We used open-source information from a local weather station in Burlington, VT, USA, at Burlington Airport, 5 km from one of the Vermont collection sites (weather station ID: GHCND: USW00014742, 44.468300, -73.149900) to determine trends in winter temperature (December, January and February) from 1940 to 2020. These trends indicate that winters were 3°C warmer, on average, in 2021 than in 1940 (Fig. 1; least-squares linear regression; daily high temperatures,  $R^2=0.11$ ,  $P=0.0013$ ,  $y=0.027x-54.15$ ; daily low temperatures,  $R^2=0.22$ ,  $P=0.0000065$ ,  $y=0.046x-101.8$ ). We calculated the average change in temperature from 1940 to 2020 by averaging the slopes in the regression fits of daily high and low temperatures and multiplying by 80 years:  $[(0.027^\circ\text{C per year}+0.046^\circ\text{C per year})/2]\times 80 \text{ years}=2.9^\circ\text{C}$ . We used these data to determine ecologically relevant winter warming temperature treatments: control, ‘chronic warming’ and ‘acute warming’. To assess population-level differences in diapause physiology, we compared control-treated individuals from North Carolina and Vermont. To assess the effects of different thermal regimes, we focused on offspring of Vermont adults. We kept control individuals under a daily fluctuating temperature regime of 4–8°C with hotter temperatures during the day and lower temperatures at night, which was established from daytime and night-time averages in Vermont during October, representing autumn temperatures when individuals first enter diapause. We kept the chronic warming treatment group under a temperature regime of 7–11°C, a 3°C increase relative to the control group, indicative of the winter warming observed since 1940 (Fig. 1). We kept the acute warming treatment group under the same conditions as the control treatment group but with three, 24 h exposure warming events of fluctuating 18–23°C on days 25, 50 and 75, which reflect the hottest recorded diurnal and nocturnal winter temperatures observed in Vermont (National Weather Service

Forecast Office, [https://w2.weather.gov/climate/local\\_data.php?wfo=btv](https://w2.weather.gov/climate/local_data.php?wfo=btv), accessed February 2020).

### Supercooling point measurement

Diapause length is variable in *P. rapae* and differs by latitude (Sømme, 1982), and we did not measure *in situ* diapause length of the source populations in North Carolina and Vermont. But while pupae in North Carolina are likely to diapause for shorter lengths of time than pupae in Vermont, based on the winter temperatures at both of these sites (December, January and February; Fig. 2B), we expect that diapause in nature lasts for at least 90 days. We measured the internal freezing temperature, or supercooling point, of the diapausing pupae based on the protocols described in Boychuk et al.

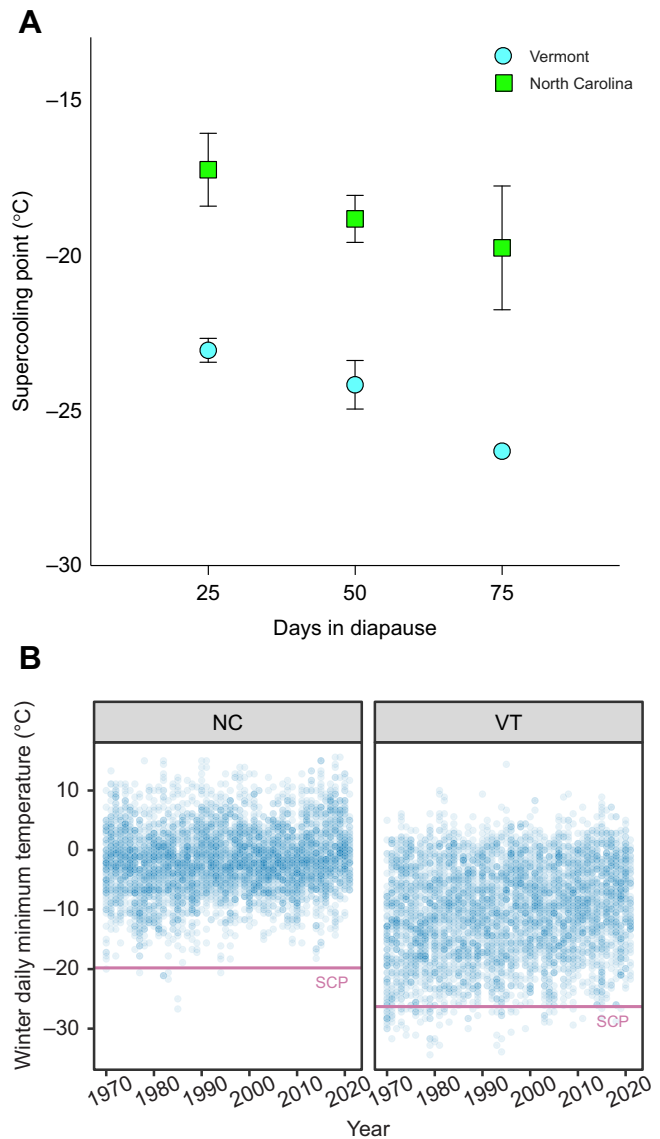

**Fig. 2. Supercooling point and historical temperature data of *Pieris rapae* study populations.** (A) Supercooling point of diapausing *P. rapae* pupae from Vermont ( $n=18$ ) and North Carolina ( $n=14$ ) exposed to control conditions (4–8°C). Supercooling point was measured on days 25, 50 and 75 after diapause induction, and is presented as mean±s.e.m. freezing temperature; error bars for Vermont individuals on day 75 are too small to be visible on the plot. (B) Winter daily minimum temperatures (daily lows) in December, January and February from 1970 to 2021 in Asheville, NC, and Burlington, VT, USA. Average supercooling point (SCP) of day 75 pupae collected from NC or VT is indicated by the horizontal pink lines.



(2015) and Sinclair et al. (2015). We weighed individual pupae every 2–4 days using a fine-scale balance at room temperature for no longer than 5 min to determine any differences in mass over the course of the 90 day experiment (Mettler Toledo XSE105). We found no statistical differences in mass over time for any of the three treatments (Type II ANOVA,  $F_{1,41}=1.62$ ,  $P=0.21$ ). Thus, we did not observe a significant loss of water throughout the experiment. Immediately prior to supercooling point measurement, we weighed each pupa. To determine the supercooling point, we placed pupae attached to a type-K thermocouple wire (OMEGA Engineering) into individual 2 ml microcentrifuge tubes, and then sealed them with Parafilm. We equilibrated individuals in a circulating water bath (Polyscience PP15R-30) with Polycool HC –50 anti-freeze liquid, maintained them at 0°C for 10 min, and then cooled them from 0°C to –30°C at a rate of 0.5°C min<sup>-1</sup>. We measured body temperature using the thermocouple, and we tracked and recorded body temperature using a handheld data logger (OMEGA Engineering HH806AW). Supercooling point was defined as the temperature at which ice formed, and was measured as the lowest temperature (°C) recorded before the detectable presence of an exothermic reaction (ice formation) in the temperature trace. We analyzed individual internal freezing temperatures on days 25, 50 and 75 in control (Vermont and North Carolina) and chronic warming individuals, and 24 h post-warming in acute warming individuals. We measured 4–7 individuals for each temperature by treatment combination. Immediately after supercooling point analysis, we flash-froze Vermont control and chronic warming individuals in liquid nitrogen and preserved them at –80°C for metabolomics analysis.

We compared supercooling points of individuals from (1) Vermont versus North Carolina populations (under control conditions), (2) Vermont control versus Vermont chronic warming groups, and (3) Vermont control versus Vermont acute warming groups using a linear model incorporating the factors day and treatment as fixed effects and pupal mass as a covariate with a Type II analysis of variance (ANOVA) using the ‘car’ package in R. Pairwise differences between the control and warmed treatments were assessed with Dunnett’s multiple comparison *post hoc* test using the ‘lsmeans’ package in R. We also investigated trends in winter temperatures at the collection sites in NC and VT and compared them with the observed supercooling point values for the North Carolina and Vermont individuals by downloading weather station data from NOAA using the R package ‘rnoaa’ (<https://CRAN.R-project.org/package=rnoaa>; NOAA, <https://www1.ncdc.noaa.gov/pub/data/ghcn/daily>, accessed March 2021). The weather station in NC is located at the Asheville Airport, 22 km from one of the NC collection sites (weather station ID: GHCND: USW00003812, 35.431900, –82.537500), and includes a complete daily temperature record from 1964 until the present. The weather station in VT used for this analysis was the same as described above. All supercooling point analyses were performed in R version 4.0.0.

### Global metabolomics sample preparation

We used individual pupae preserved from the supercooling point analysis for global, untargeted metabolomics analysis. To determine the effect of chronic warming on metabolite abundance, we only used control and chronic warming Vermont individuals ( $n=17$  pupae per group) with at least 4 individuals represented at each time point (days 25, 50 and 75). All samples were sent to the University of Florida Southeast Center for Integrated Metabolomics facility for analysis.

Samples were homogenized in 100 µl of 5 mmol l<sup>-1</sup> ammonium acetate and protein concentration of each sample homogenate was measured. All samples were normalized to 500 µg ml<sup>-1</sup> protein concentration prior to extraction. Note that because samples were normalized to equal concentrations prior to metabolomics analysis, we did not normalize metabolite abundance to pupal mass. Extraction was performed using protein precipitation. Briefly, 50 µl normalized homogenate was spiked with a mixture of internal standard. Proteins were precipitated by adding 400 µl of 8:1:1 acetonitrile:methanol:acetone. After mixing, proteins were allowed to precipitate for 15 min at 4°C. Supernatant from each sample was collected following centrifugation at 20,000 *g* for 10 min and dried under a gentle stream of nitrogen at 30°C. Samples were reconstituted with 50 µl of reconstitution solution consisting of injection standards and transferred to LC vials for analysis.

### LC-MS analysis and data processing

Untargeted metabolomics analysis was performed on a Thermo Q-Exactive Orbitrap mass spectrometer with Dionex UHPLC and autosampler. All samples were analyzed in positive and negative heated electrospray ionization with a mass resolution of 35,000 at  $m/z$  200 as separate injections. Separation was achieved on an ACE 18-pfp 100×2.1 mm, 2 µm column with mobile phase A as 0.1% formic acid in water and mobile phase B as acetonitrile. The flow rate was 350 µl min<sup>-1</sup> with a column temperature of 25°C. Injection volume was 2 µl.

MZmine 2.0 was used to identify features, deisotope, align features and perform gap filling to fill in any features that may have been missed in the first alignment algorithm. All adducts and complexes were identified and removed from the dataset. This rendered a total of 14,379 features, which we analyzed for significant responses to warming (see below). We used MetaboAnalyst 4.0 (Chong et al., 2019) to normalize the mass spectrometry peak intensities of metabolite features prior to statistical analyses. For each feature, peak intensity was log-transformed and normalized to the sample median. The data were auto-scaled to facilitate comparison among features. Raw metabolomics data were deposited in Dryad (doi:10.5061/dryad.sn02v6x53).

### Statistical analysis of metabolomic data

To test for differences in metabolite abundance between the Vermont control and chronic warming pupae, we compared the normalized peak intensities, as a proxy for metabolite abundance, of all metabolite features identified by LC-MS. We conducted a principal components analysis to describe the major axes of variation in the dataset, and then tested whether the first principal component (PC1) significantly explained variation in supercooling point among the samples via least-squares linear regression. We then measured the number of metabolites with significantly different peak intensities via Type II ANOVA, with treatment and days in diapause modeled as fixed effects. Features in the positive and negative ion modes were analyzed separately. All *P*-values were corrected for false discovery via the Benjamini–Hochberg method (Benjamini and Hochberg, 1995). All metabolite features with a false discovery rate (FDR) <0.05 were considered to have significantly different abundances. Unless otherwise indicated, we performed all statistical analyses for the metabolomics data using R version 4.0.0.

### Metabolite annotation and pathway analysis

We used the MS Peaks to Pathways module in MetaboAnalyst 4.0 (Chong et al., 2019) to annotate metabolome features and to conduct

pathway analysis. Accurate annotation of untargeted metabolomics data is dependent upon a library of verified standards, which are often incomplete and not representative of the focal species (Li et al., 2013). The MS Peaks to Pathways approach subverts these shortcomings by identifying metabolite sets in the context of KEGG pathways. Metabolite annotation of features is based upon the mass-to-charge ratios in the context of pathways whose compounds are found to respond in a coordinated manner to experimental manipulation (i.e. warming). Because the goal of this study was to assess the physiological consequences of warming, we focused our pathway analysis and metabolite annotation on the features that were identified to change in abundance in response to chronic warming. We conducted the GSEA algorithm in the MS Peaks to Pathways module of MetaboAnalyst 4.0, which is a rank-based pathway enrichment test. Metabolite features were ranked based on the  $F$ -value from the treatment main effect from the ANOVA (see above). We used the *Drosophila melanogaster* KEGG pathway database, which is the only insect species for which KEGG pathway information is available, to identify significantly enriched pathways and metabolites in our dataset. Pathways with an FDR-corrected  $P$ -value less than 0.1 were considered significant, following the recommendations of the authors of the analysis software.

## RESULTS

### Effects of population of origin on supercooling

Supercooling point was significantly lower (more negative) in Vermont pupae than in North Carolina pupae throughout the 75 days of diapause (Fig. 2A; 3-way ANOVA; population factor,  $F_{1,24}=60.056$ ,  $P<0.0001$ ). Supercooling point decreased over days in diapause in both Vermont and North Carolina pupae (Fig. 2A; 3-way ANOVA; day factor,  $F_{1,24}=11.466$ ,  $P=0.002$ ; population $\times$ day interaction,  $F_{1,24}=0.382$ ,  $P=0.543$ ). Supercooling point averaged  $-26.3\pm 0.3^\circ\text{C}$  in Vermont pupae and  $-19.8\pm 4.0^\circ\text{C}$  in North Carolina

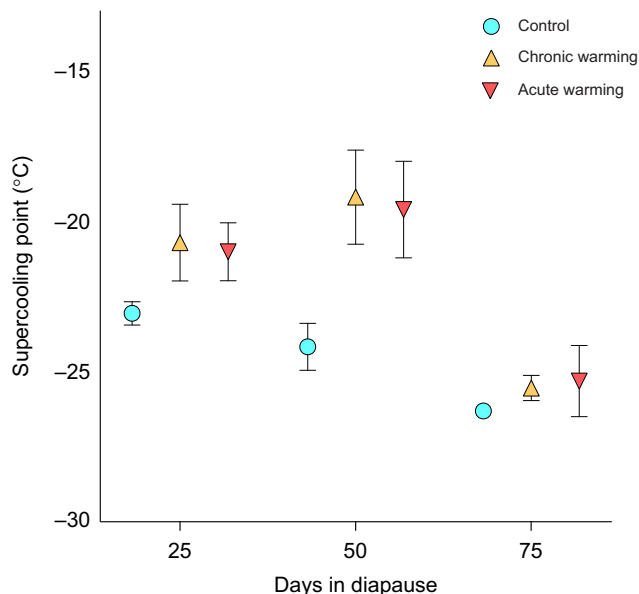

**Fig. 3. Acute and chronic warming caused higher supercooling points.** Diapausing pupae were exposed to one of three temperature treatments: control ( $4\text{--}8^\circ\text{C}$ ,  $n=18$ ), acute warming ( $18\text{--}23^\circ\text{C}$ ,  $n=17$ ) or chronic warming ( $7\text{--}11^\circ\text{C}$ ,  $n=17$ ). Supercooling point was measured on days 25, 50 and 75 after diapause induction for the control and chronic warming pupae, and 24 h post-warming (days 26, 51 and 76) for the acute warming pupae, and is presented as mean $\pm$ s.e.m. freezing temperature; error bars for control pupae on day 75 are too small to be visible on the plot.

pupae at day 75, which corresponds to the disparate extreme low temperatures in these two locations – average extreme minimum temperatures in VT and NC are  $-29$  to  $-26^\circ\text{C}$  and  $-18$  to  $-15^\circ\text{C}$ , respectively (Fig. 2B). Pupal mass had no effect on supercooling point (3-way ANOVA; mass covariate,  $F_{1,24}=0.677$ ,  $P=0.419$ ).

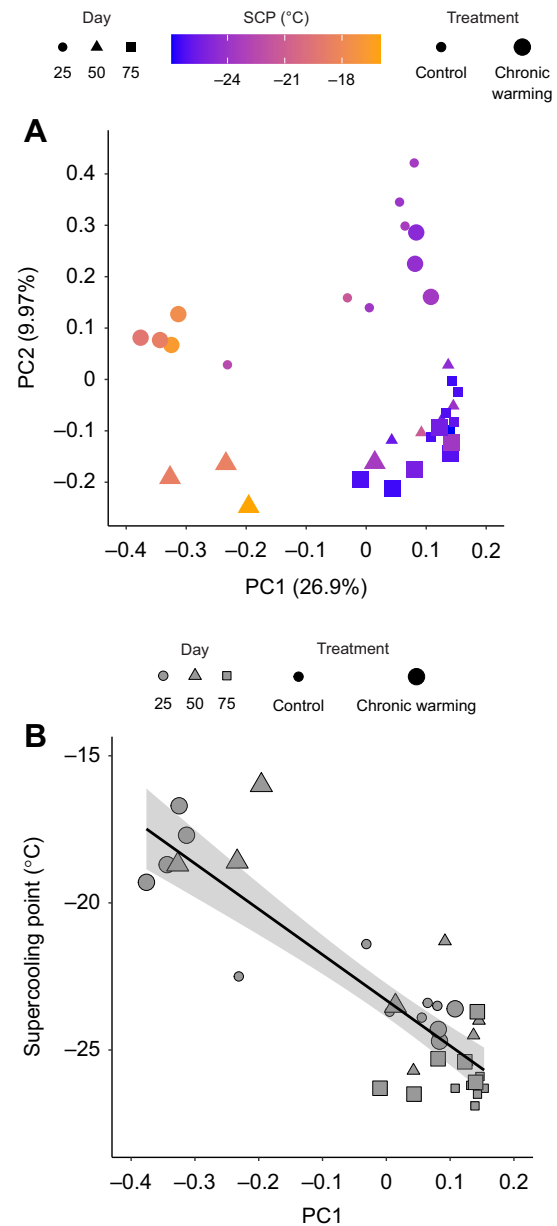

**Fig. 4. Whole metabolomes cluster by supercooling point and days in diapause for Vermont pupae in the control and chronic warming groups.** (A) Principal components analysis of normalized intensity of 14,379 metabolite features among 34 pupae. Each point represents the metabolome of an individual pupa, collapsed in principal component space for the first two principal components that describe 37% of the variation among metabolomes: 26.9% of the variation in metabolomes (PC1) separates pupae by supercooling point, and 9.97% of the variation (PC2) separates pupae by days in diapause. (B) Variation among metabolomes is correlated to supercooling point. Day in diapause is indicated by symbol shape and warming treatment by symbol size for both A and B; supercooling point (SCP) is indicated by symbol color in A.

### Effects of acute and chronic warming on supercooling in Vermont pupae

Chronic and acute warming caused higher supercooling points in Vermont pupae (Fig. 3; 3-way ANOVA; warming factor,  $F_{2,40}=4.928$ ,  $P=0.012$ ). Supercooling point was significantly higher in warmed pupae on day 50 in diapause, but trended higher in warmed pupae even by day 25 (Fig. 3; Dunnett's multiple comparison test; d.f.=34; day 25, control versus acute warming,  $t$ -ratio=1.545,  $P=0.23$ , control versus chronic warming,  $t$ -ratio=1.582,  $P=0.22$ ; day 50, control versus acute warming,  $t$ -ratio=2.462,  $P=0.036$ , control versus chronic warming,  $t$ -ratio=2.827,  $P=0.015$ ). By day 75, there was no difference in supercooling point between control and warmed pupae (Fig. 3; Dunnett's test; day 75, control versus acute warming,  $t$ -ratio=0.726,  $P=0.69$ , control versus chronic warming,  $t$ -ratio=0.59,  $P=0.81$ ). There was an overall decrease in supercooling point on day 75, regardless of treatment, and this time point had the lowest average supercooling points (Fig. 3; 3-way ANOVA; day factor,  $F_{1,40}=18.93$ ,  $P<0.0001$ ; warming $\times$ day interaction,  $F_{2,40}=0.268$ ,  $P=0.77$ ). Mass had no effect on supercooling point for control, chronic warming or acute warming pupae (3-way ANOVA, mass covariate,  $F_{1,40}=0.829$ ,  $P=0.368$ ).

### Effects of chronic warming on the metabolome in Vermont pupae

Untargeted metabolomics identified a total of 14,379 metabolite features in all pupae from the control and chronic warming experimental groups. Of these, 1370 showed significant changes in abundance (normalized peak intensity) through diapause, irrespective of warming treatment (2-way ANOVA; day factor,  $FDR<0.01$ ); 443 features showed significant changes in abundance in response to chronic warming (2-way ANOVA; temperature factor,  $FDR<0.01$ ) and 16 features showed significant changes in abundance through diapause and in response to warming. No features had abundances that depended on the interaction between day and treatment (2-way ANOVA; day $\times$ temperature interaction, all features  $FDR>0.24$ ).

Metabolite feature abundance representing individual metabolomes revealed that individuals cluster primarily by supercooling point, which accounted for nearly 27% of the total variation in abundance of all 14,379 features among pupae

(Fig. 4A). In addition, days in diapause accounted for 10% of the total variation in metabolomic profiles (Fig. 4A). The variation among metabolomes, as described by PC1, was strongly correlated to supercooling point (Fig. 4B; least-squares linear regression of PC1 on supercooling point,  $y=-15.48x-23.3$ ,  $R^2=0.73$ ,  $P<0.00001$ ).

The coordinated changes in the metabolome that accompanied the chronic warming treatment constituted significant changes within 10 biochemical pathways (Fig. 5; Table S1). Chronic warming caused the metabolite abundance in most (7 out of 10) of these pathways to decrease. However, one pathway (arachidonic acid metabolism) showed increases in the abundance of its metabolites. Two pathways (valine, leucine and isoleucine biosynthesis and valine, leucine and isoleucine degradation) showed both increases and decreases in metabolite abundance, and thus these two pathways did not exhibit directionality in warming-induced changes overall (Fig. 5). Three of the pathways –  $\beta$ -alanine metabolism, fructose and mannose metabolism, and glycine, serine and threonine metabolism – implicate the involvement of previously described cryoprotectants, including  $\beta$ -alanine, sorbitol and glycine (Hahn and Denlinger, 2011; Lee, 2010; Michaud and Denlinger, 2007).

### Responses of putative cryoprotectants to warming

Pupae with the lowest supercooling points had the highest abundance of three putative cryoprotectants,  $\beta$ -alanine, sorbitol and glycine, and supercooling point was negatively correlated with the abundance of all of these metabolites (Fig. 6A,C,E; least-squares linear regression;  $\beta$ -alanine:  $y=-2.83x-23.31$ ,  $R^2=0.72$ ,  $P<0.00001$ ; sorbitol:  $y=-3.4x-23.31$ ,  $R^2=0.70$ ,  $P<0.00001$ ; glycine:  $y=-2.33x-23.31$ ,  $R^2=0.55$ ,  $P<0.00001$ ). Moreover, all three of these metabolites showed significant decreases in abundance after chronic warming (Fig. 6B,D,F; 2-way ANOVA;  $\beta$ -alanine: temperature factor,  $F_{1,30}=17.16$ ,  $P=0.0003$ ; day factor,  $F_{1,30}=12.00$ ,  $P=0.002$ ; temperature $\times$ day interaction,  $F_{1,30}=2.34$ ,  $P=0.14$ ; sorbitol: temperature factor,  $F_{1,30}=11.11$ ,  $P=0.002$ ; day factor,  $F_{1,30}=5.84$ ,  $P=0.02$ ; temperature $\times$ day interaction,  $F_{1,30}=0.10$ ,  $P=0.62$ ; glycine: temperature factor,  $F_{1,30}=11.36$ ,  $P=0.002$ ; day factor,  $F_{1,30}=4.52$ ,  $P=0.02$ ; temperature $\times$ day interaction,  $F_{1,30}=2.30$ ,  $P=0.12$ ).

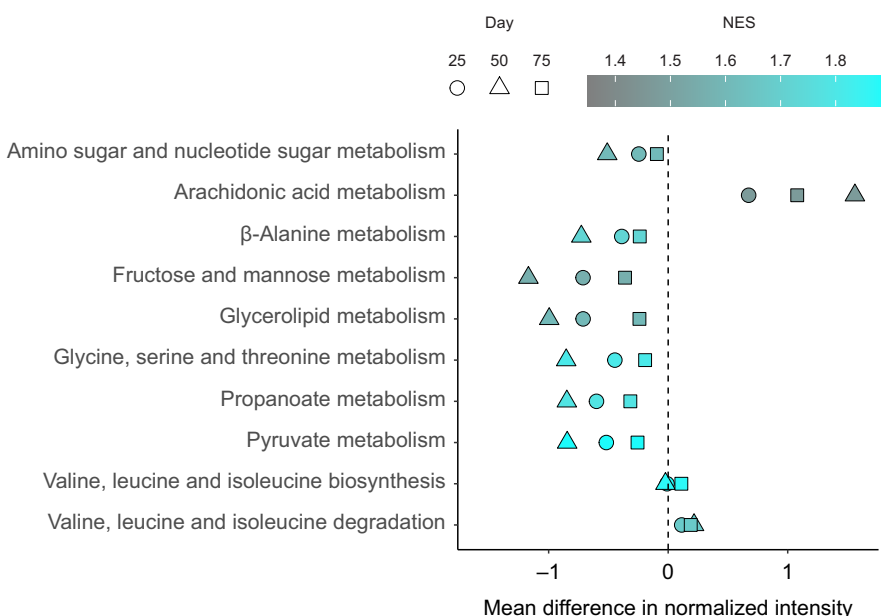

**Fig. 5. Pathways significantly changed in response to warming.** Mean differences in normalized intensity (chronic warming–control), averaged among all features in a given pathway and among pupae on a given day in diapause, for 10 pathways whose member KEGG compounds showed significant differences in normalized intensity in warmed pupae. Represented in the 10 pathways are 153 features that mapped to 81 annotated KEGG compounds. Positive values (x-axis) indicate higher abundance of metabolites in warmed pupae, and negative values indicate lower abundance in warmed pupae, relative to controls. Day in diapause is indicated by symbol shape and normalized enrichment score (NES) is indicated by the color scale. Pathways with higher NES reflect greater proportions of metabolites that were found to be overrepresented in the pathway enrichment analysis. Pathways are listed in alphabetical order.

## DISCUSSION

A key question in the fields of ecological and evolutionary physiology is how populations and species will respond to future climate change. Our data shed light on this question in two ways. First, we report variation in supercooling among populations of *P. rapae* that matches the historical winter thermal environments in Vermont and North Carolina, USA. Whether or not this difference in supercooling ability is a fixed divergence that resulted from local adaptation is an open question. But regardless of the cause, these data suggest that the natural thermal environment influences overwintering physiology in *P. rapae*, which could have consequences for this species in the future. If there is standing genetic variation in supercooling among populations, then natural selection could act upon this variation and lead to evolutionary responses in supercooling to future winter warming conditions. Second, we demonstrate that warming modified the intrinsic physiological mechanisms that underlie freeze avoidance in diapausing *P. rapae* pupae, as warming led to less-negative supercooling points that were accompanied by shifts in the metabolomic signatures of cryoprotection and other metabolic pathways. Because supercooling is a key trait for the survival of freeze avoidant overwintering insects, our results suggest that higher

supercooling points that are induced by warming could threaten *P. rapae* if these insects subsequently encounter periodic extreme cold events.

While the present study cannot attribute differences in supercooling between populations of *P. rapae* to a genetic basis, mounting evidence suggests that there is standing genetic variation in various cold tolerance traits in insect populations. In *D. melanogaster*, there is evidence of clinal variation in chill coma recovery time (Hoffmann et al., 2002), and this trait has been shown to evolve in response to laboratory selection (Williams et al., 2014b). In addition, there is a substantial degree of standing genetic variation in whole-organism cold tolerance even in a single population of *D. melanogaster* (Teets and Hahn, 2018). In the pitcher plant mosquito, *Wyeomyia smithii*, classic work by Bradshaw et al. (2004) used reciprocal transplants to demonstrate significant local adaptation in cold tolerance between northern and southern populations. In *Colias* spp. of butterflies, there is evidence of local adaptation in supercooling across elevational gradients that corresponds to winter climates in lowland versus mountain habitats in Europe (Vrba et al., 2014). Because cold tolerance has evolved in the past, these patterns suggest that overwintering traits could evolve in response to future winter warming; however, the presence of genetic variation in overwintering traits does not necessarily mean that these traits will evolve, even if natural selection is predicted to act upon these traits in a warmer world. It could be that maintaining robust cold tolerance traits, such as supercooling, in itself does not pose a significant cost. Indeed, warmer winters may lead to selection on photoperiodic cues that shorten diapause, rather than direct selection on cold tolerance per se (Bradshaw and Holzapfel, 2010; Bradshaw et al., 2004). Ultimately, responses of insect populations to future winter warming will depend not only on the degree of warming but also on the level of thermal variation. Our data suggest that even short-term (24 h) warming may compromise supercooling, which could have deleterious consequences if warm anomalies are followed by extreme low temperatures (see below).

Our results suggest that warming could threaten the survival of *P. rapae* pupae in nature by compromising supercooling ability. Although the observed supercooling points in warmed pupae were relatively low, these supercooling points are within the range of winter temperatures in Vermont. Thus, the warmed pupae from this study could have frozen to death in the wild. Note that chilling injury, i.e. death from cold exposure before the formation of ice (Sinclair, 2015), was not measured in the present study. Thus, further work is necessary to characterize the broader effects of warming on lower thermal limits, particularly in nature. Other studies have also shown that increased thermal variability leads to decreased cold hardiness in diapausing insects, including the cabbage root fly, *Delia radicum* (Košťál and Šimek, 1995), the emerald ash borer, *Agrilus planipennis* (Sobek-Swant et al., 2012), the hemlock looper, *Lambdina fiscellaria* (Rochefort et al., 2011; Vallières et al., 2015), and the anise swallowtail butterfly, *Papilio zelicaon* (Williams et al., 2014a).

The timing of winter warming, and subsequent cold challenges, may be an important factor that determines the relative risk for *P. rapae* in warmer winters. Supercooling points decreased throughout diapause in the present study, and many insect species have been shown to follow this same trajectory through diapause (Bale, 2002; Hodek and Hodková, 1988; Marshall and Sinclair, 2015; Pullin et al., 1991), which mirrors decreasing winter temperatures from December through to February. Meanwhile, in the present study, pupae at day 50 in diapause showed the largest increase in supercooling points after warming treatment, yet day 75

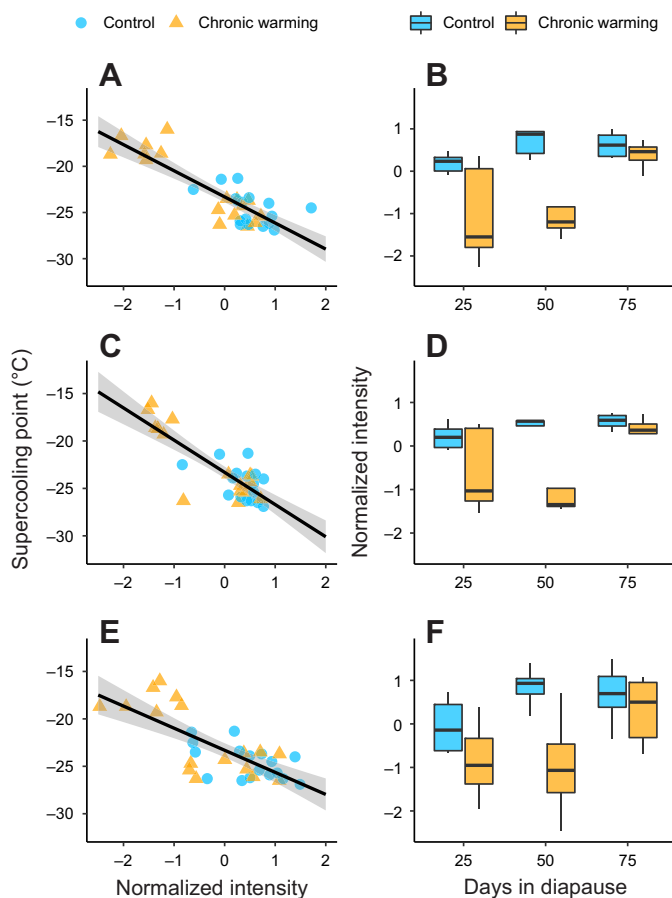

**Fig. 6. Putative cryoprotectants that correlated with supercooling point and were lower in abundance after warming.**

Plotted are the relationships between metabolite abundance and supercooling point (A,C,E) and metabolite abundance across days in diapause (B,D,F) for  $\beta$ -alanine (A,B), sorbitol (C,D) and glycine (E,F). Data represent mean normalized intensity of all features that matched a given metabolite ( $\beta$ -alanine: 3 features, sorbitol: 11 features, glycine: 1 feature).



pupae maintained low supercooling points in spite of warming. The disparate responses of pupae to warming at day 50 versus day 75 could have been due to increased vulnerability to thermal challenge at day 50 in diapause. Indeed, some stages of diapause may be more thermally responsive than others, as has been observed during metamorphosis in *D. melanogaster* (Merkey et al., 2011). Alternatively, it may not have been the vulnerability of day 50 pupae, but rather the ability of pupae to physiologically acclimate to chronic warming by day 75, such that they could regain low supercooling points. If this were the case, it would help explain the similarity in metabolomes of all day 75 pupae, regardless of warming treatment (Fig. 4A). Thermal acclimation to periodic warming has been previously shown to improve cold hardiness in locust eggs, *Locusta migratoria* (Wang et al., 2006), and adult fruit flies, *D. melanogaster* (Colinet et al., 2016).

We note that extrapolating our results to what pupae experience in nature assumes the direct exposure of diapausing pupae to changes in atmospheric temperatures, which may or may not be a realistic assumption, depending on snow cover that could insulate insects against thermal fluctuations (Boychuk et al., 2015; Sinclair, 2001). However, winter warming is predicted to lead to loss of or reduction in snow cover, which would subsequently expose diapausing individuals to fluctuating temperatures and to a higher number of freeze–thaw events (Bale and Hayward, 2010). We also acknowledge that supercooling is a mechanism of cold tolerance that is more critical for species that are freeze avoidant, i.e. species that cannot survive if they experience internal freezing, than for species that are freeze tolerant, i.e. species that can survive if they experience internal freezing (Marshall and Sinclair, 2012). It remains to be determined whether freeze tolerant species will be challenged by winter warming; however, thermal acclimation influences cold tolerance in at least some freeze tolerant insects (Li et al., 2020; Toxopeus et al., 2019), suggesting that winter warming may also impact species that are freeze tolerant and not just species that are freeze avoidant, as we have shown here.

Our untargeted metabolomic analysis identified more than 14,000 metabolite features, and the results reveal three major findings. First, supercooling in *P. rapae* diapausing pupae may be influenced by the abundance of thousands of metabolites, as a large proportion of the variance (27%) in abundance of metabolites across the whole metabolome and among pupae significantly correlated to supercooling point. Previous work has established a solid paradigm for interpreting the relationship between cold tolerance traits and metabolite abundance. Overwintering insects accumulate higher concentrations of key metabolites, or cryoprotectants, to lower the freezing point of intracellular and extracellular solutions (Bale, 2002; Storey and Storey, 1988, 1991). Thus, it is perhaps not surprising to see correlations between metabolite abundance and supercooling, particularly among putative cryoprotectants, such as  $\beta$ -alanine, sorbitol and glycine (Michaud and Denlinger, 2007; Michaud et al., 2008; Storey and Storey, 1991). In addition, sorbitol and glycine have been shown to stabilize macromolecular structures such as proteins (Street et al., 2006; Yancey et al., 1982), suggesting other potential benefits of these compounds in addition to freezing point depression. Targeted metabolomics studies that measure tens to hundreds of metabolites corroborate the relationship between metabolite abundance and various cold tolerance traits, including supercooling (Košťál et al., 2007, 2011; Lehmann et al., 2018; Michaud and Denlinger, 2007). Our data provide a broadscale perspective on the potential role of the metabolome in setting lower thermal limits, which extends previous work to implicate the involvement of a wide array of molecular players.

Alternatively, warming-induced changes in supercooling point and metabolite abundance, including cryoprotectants, could have occurred independently from one another. It is important to note that the present study does not fully account for the diversity of potential mechanisms that underlie supercooling. A critical factor that influences the supercooling point is osmolality, which we did not measure in this study. Dissolved solutes in an insect's hemolymph colligatively lower their freezing point by 1.86°C per osmole of solute (Denlinger and Lee, 2010), but other non-colligative mechanisms, such as ice-binding proteins, can contribute to the lowering of supercooling point as well (Meister et al., 2013). If non-colligative mechanisms contribute to supercooling in diapausing *P. rapae* pupae, then the metabolomic data we present herein would not fully describe the mechanisms that underlie the shifts in supercooling point that occurred in response to warming. Nonetheless, the correlation between the metabolome and supercooling is noteworthy and deserves further investigation. Future studies should measure osmolality (indicative of colligative mechanisms) and thermal hysteresis (indicative of non-colligative mechanisms) in response to warming to provide further insight into the connection between putative cryoprotectant metabolites and supercooling in overwintering species.

The second major finding of the metabolomics screen is that chronic warming (+3°C) caused shifts in core metabolic pathways, suggesting that even subtle changes in temperature lead to changes in metabolism during diapause. Overwhelmingly, warming caused metabolite abundance to decrease; for example, metabolites within the fructose and mannose metabolism pathway, glycerolipid metabolism pathway, and pyruvate metabolism pathway were all significantly higher in control individuals (Fig. 3). Previous work has shown that metabolomes are dynamic, shift throughout diapause, and respond to temperature (Košťál et al., 2007, 2011; Lehmann et al., 2018; Michaud and Denlinger, 2007). We noted shifts in the metabolome through time, as the second main axis (PC2), which accounted for approximately 10% of the variation in metabolomic profiles among pupae, separated day 25 pupae from day 50 and day 75 pupae. But regardless of these metabolomic shifts that occurred through diapause, many of the changes in metabolomic profiles were induced by warming, particularly at day 50 in diapause. Moreover, many of the pathways that shifted in response to warming are involved in energy metabolism, such as pyruvate metabolism. Warming-induced decreases in the metabolites involved in pyruvate metabolism could indicate alterations in glycolysis or glycogenolysis, suggesting that ATP-generating pathways could respond to winter warming exposure (Denlinger and Lee, 2010). This is of particular concern because diapausing pupae should be metabolically quiescent and able to maintain stable metabolism throughout diapause. Yet, if warming increases energy metabolism, then this could lead diapausing pupae to deplete their energy reserves. In addition, the maintenance of cold tolerance during diapause is dependent on the availability of energy reserves, as fuel sources (lipids, carbohydrates and amino acids) are also used as anti-freezing cryoprotectants (Denlinger, 2002; Hahn and Denlinger, 2011; Storey and Storey, 2012). We did not assay total lipid or sugar content, nor did we measure metabolic rate; thus, the significance of these findings remains unresolved. Nevertheless, the characterization of energetics in the context of warming in diapause is likely to be a worthwhile avenue of future research.

Third, untargeted metabolomics elucidated patterns of metabolite abundance that we would not have otherwise seen if we had taken a targeted metabolomics approach. For example, the arachidonic acid metabolism pathway was the only pathway in which metabolites



exhibited increased abundance in warmed pupae (Fig. 3). The specific function of arachidonic acid in diapausing *P. rapae* pupae remains to be determined, but based on what is known about the role of arachidonic acid in hibernating mammals, this result suggests that winter warming may impact the utilization of energy stores. Arachidonic acid is a long-chain fatty acid that has been shown to regulate the activity of peroxisome proliferator-activated receptor  $\alpha$ , a protein involved in mobilizing lipid stores (Wu et al., 2001) and a key regulator of lipid metabolism upon entrance into hibernation in ground squirrels, *Spermophilus tridecemlineatus* (Buck et al., 2002). Functional data on arachidonic acid in insects is lacking; thus, the potential role of arachidonic acid in regulating energetic processes during diapause remains obscure. It has been shown that arachidonic acid is a key polyunsaturated fatty acid in the cellular membrane phospholipids of *Manduca sexta* (Ogg et al., 1991) and arachidonic acid is down-regulated in diapausing pupae of the flesh fly *Sarcophaga crassipalpis* following acute cold stress (Michaud and Denlinger, 2006). But further study is needed to unravel the potential role of arachidonic acid in the context of diapause and environmental change in insects.

### Winter warming: good or bad?

Whether winter warming will benefit or hinder overwintering organisms is currently under debate. Some research argues that warmer winter temperatures will result in beneficial effects on temperate species, as these warmer patterns could lead to increased survival, decreased cold-induced stress and the ability to expand geographic ranges (Crozier, 2003). If cold stress lowers survival in ectothermic organisms, then the predicted 1–5°C increase in winter temperatures could increase survival through winter (Bale and Hayward, 2010). Although this prediction may be true for some species, based upon the data we present herein, not all overwintering organisms will benefit from winter warming. Indeed, previous research on *Pieris napi* has shown that chilling and cold temperatures are needed for endogenous diapause to maintain its developmental trajectory and to progress to post-diapause quiescence for spring emergence (Lehmann et al., 2018; Posledovich et al., 2015). Thus, warming could disrupt the transition into post-diapause development, leading to a longer diapause state or decreased eclosion success. An additional consequence of winter warming may be the earlier spring emergence of insects, including many butterfly and bee species (Bartomeus et al., 2011; Bosch and Kemp, 2003). This phenomenon has potentially negative effects if it causes asynchrony with insects' host plants or if individuals experience severe environmental conditions post-emergence. Warming may also lead to shifts in the diapause program, including delays to diapause entry, decoupling of environmental cues (temperature and photoperiod) that maintain diapause, and/or the elimination of diapause completely (Bale and Hayward, 2010; Hodek and Hodková, 1988). Thus, at least for insects that have evolved to overwinter in a dormant state, winter warming may pose a significant environmental challenge (Stuhldreher et al., 2014), despite the presence of conditions that are seemingly less harsh.

### Conclusion

Our study provides a molecular physiological perspective on the effects of temperature on the physiology of overwintering insects, thus providing insight into the challenges that species may endure as winter temperatures increase and fluctuate with climate change. Future research exploring the effects of warming on overwintering organisms should address not only the direct effects of warming on physiological mechanisms and maintenance, as measured here, but

also pre- and post-winter development and subsequent reproductive success after eclosion. Furthermore, research should also focus on comparing populations, ideally in a reciprocal transplant experimental design, to better understand population-level responses and assess the degree to which overwintering traits are locally adapted. This will allow us to better predict the adaptive potential of overwintering traits in the face of winter warming.

### Acknowledgements

We thank Caitlin Decara, Hannah Lewis and Grace Seta for butterfly collections and larval stage husbandry. We thank Amy Boyd and her students at Warren Wilson College for North Carolina butterfly collections. We thank the University of Florida Southeast Center for Integrated Metabolomics facility for processing the metabolomics samples. We thank Alison Brody, Ingi Agnarsson, Sara Helms Cahan, Sumaetee Tangwancharoen, Thomas O'Leary, and the three anonymous reviewers for helpful comments on this manuscript.

### Competing interests

The authors declare no competing or financial interests.

### Author contributions

Conceptualization: E.E.M., B.L.L.; Methodology: E.E.M., B.L.L.; Formal analysis: E.E.M., B.L.L.; Investigation: E.E.M.; Data curation: E.E.M.; Writing - original draft: E.E.M.; Writing - review & editing: E.E.M., B.L.L.; Visualization: E.E.M., B.L.L.; Supervision: B.L.L.; Project administration: B.L.L.; Funding acquisition: E.E.M., B.L.L.

### Funding

This work was supported by National Science Foundation grant IOS-1750322 to B.L.L., and the John Wheeler Endowment and Dr Roberto Fabri Fialho Research Award through the University of Vermont to E.E.M.

### Data availability

Raw metabolomics data are available from the Dryad digital repository (Mikucki and Lockwood, 2021): doi:10.5061/dryad.sn02v6x53

### References

- Allen, M., Antwi-Agyei, P., Aragon-Durand, F., Babiker, M., Bertoldi, P., Bind, M., Brown, S., Buckeridge, M., Camilloni, I. and Cartwright, A. (2019). *Technical Summary: Global Warming of 1.5°C: An IPCC Special Report on the Impacts of Global Warming of 1.5°C above Pre-Industrial Levels and Related Global Greenhouse Gas Emission Pathways, in the Context of Strengthening the Global Response to the Threat of Climate Change, Sustainable Development, and Efforts to Eradicate Poverty*. Intergovernmental Panel on Climate Change.
- Arambourou, H. and Robby, S. (2015). Warmer winters modulate life history and energy storage but do not affect sensitivity to a widespread pesticide in an aquatic insect. *Aquat. Toxicol.* **167**, 38–45. doi:10.1016/j.aquatox.2015.07.018
- Bale, J. S. (2002). Insects and low temperatures: from molecular biology to distributions and abundance. *Philos. Trans. R. Soc. Biol. Sci.* **357**, 849–862. doi:10.1098/rstb.2002.1074
- Bale, J. S. and Hayward, S. A. L. (2010). Insect overwintering in a changing climate. *J. Exp. Biol.* **213**, 980–994. doi:10.1242/jeb.037911
- Bartomeus, I., Ascher, J. S., Wagner, D., Danforth, B. N., Colla, S., Kornbluth, S. and Winfree, R. (2011). Climate-associated phenological advances in bee pollinators and bee-pollinated plants. *Proc. Natl. Acad. Sci. USA* **108**, 20645–20649. doi:10.1073/pnas.1115559108
- Benjamini, Y. and Hochberg, Y. (1995). Controlling the false discovery rate: a practical and powerful approach to multiple testing. *J. R. Stat. Soc. Ser. B* **57**, 289–300. doi:10.1111/j.2517-6161.1995.tb02031.x
- Bosch, J. and Kemp, W. P. (2003). Effect of wintering duration and temperature on survival and emergence time in males of the orchard pollinator *Osmia lignaria* (Hymenoptera: Megachilidae). *Environ. Entomol.* **32**, 711–716. doi:10.1603/0046-225X-32.4.711
- Boyчук, E. C., Smiley, J. T., Dahlhoff, E. P., Bernardis, M. A., Rank, N. E. and Sinclair, B. J. (2015). Cold tolerance of the montane Sierra leaf beetle, *Chrysomela aeneicollis*. *J. Insect Physiol.* **81**, 157–166. doi:10.1016/j.jinsphys.2015.07.015
- Bradshaw, W. E. and Holzapfel, C. M. (2010). Insects at not so low temperature: climate change in the temperate zone and its biotic consequences. In *Low Temperature Biology of Insects* (ed. D. Denlinger and R. Lee), pp. 242–275. Cambridge University Press. doi:10.1017/CBO9780511675997.011
- Bradshaw, W. E., Zani, P. A. and Holzapfel, C. M. (2004). Adaptation to temperate climates. *Evolution* **58**, 1748–1762. doi:10.1111/j.0014-3820.2004.tb00458.x

- Buck, M. J., Squire, T. L. and Andrews, M. T.** (2002). Coordinate expression of the PDK4 gene: a means of regulating fuel selection in a hibernating mammal. *Physiol. Genomics* **8**, 5-13. doi:10.1152/physiolgenomics.00076.2001
- Buckley, L. B. and Kingsolver, J. G.** (2012). Functional and phylogenetic approaches to forecasting species' responses to climate change. *Annu. Rev. Ecol. Evol. Syst.* **43**, 205-226. doi:10.1146/annurev-ecolsys-110411-160516
- Buckley, L. B., Arakaki, A. J., Cannistra, A. F., Kharouba, H. M. and Kingsolver, J. G.** (2017). Insect development, thermal plasticity and fitness implications in changing, seasonal environments. *Integr. Comp. Biol.* **57**, 988-998. doi:10.1093/icb/ixc032
- Chen, C., Mahar, R., Merritt, M. E., Denlinger, D. L. and Hahn, D. A.** (2021). ROS and hypoxia signaling regulate periodic metabolic arousal during insect dormancy to coordinate glucose, amino acid, and lipid metabolism. *Proc. Natl. Acad. Sci. USA* **118**, e2017603118. doi:10.1073/pnas.2017603118
- Chong, J., Wishart, D. S. and Xia, J.** (2019). Using metaboanalyst 4.0 for comprehensive and integrative metabolomics data analysis. *Curr. Protoc. Bioinformatics* **68**, e86. doi:10.1002/cpb1.86
- Coleman, P. C., Bale, J. S. and Hayward, S. A. L.** (2014). Cross-generation plasticity in cold hardiness is associated with diapause, but not the non-diapause developmental pathway, in the blow fly *Calliphora vicina*. *J. Exp. Biol.* **217**, 1454-1461. doi:10.1242/jeb.098053
- Colinet, H., Sinclair, B. J., Vernon, P. and Renault, D.** (2015). Insects in fluctuating thermal environments. *Annu. Rev. Entomol.* **60**, 123-140. doi:10.1146/annurev-ento-010814-021017
- Colinet, H., Renault, D., Javal, M., Berková, P., Šimek, P. and Košťál, V.** (2016). Uncovering the benefits of fluctuating thermal regimes on cold tolerance of *Drosophila* flies by combined metabolomic and lipidomic approach. *Biochim. Biophys. Acta (BBA) Mol. Cell Biol. Lipids* **1861**, 1736-1745. doi:10.1016/j.bbalip.2016.08.008
- Crozier, L.** (2003). Winter warming facilitates range expansion: cold tolerance of the butterfly *Atalopedes campestris*. *Oecologia* **135**, 648-656. doi:10.1007/s00442-003-1219-2
- Denlinger, D. L.** (2002). Regulation of diapause. *Ann. Rev. Entomol.* **47**, 93-122. doi:10.1146/annurev.ento.47.091201.145137
- Denlinger, D. L. and Lee, R. E. J.** (2010). *Low Temperature Biology of Insects*. Cambridge: Cambridge University Press.
- Duman, J. G.** (2015). Animal ice-binding (antifreeze) proteins and glycolipids: an overview with emphasis on physiological function. *J. Exp. Biol.* **218**, 1846-1855. doi:10.1242/jeb.116905
- Feder, M. E. and Walsler, J.-C.** (2005). The biological limitations of transcriptomics in elucidating stress and stress responses. *J. Evol. Biol.* **18**, 901-910. doi:10.1111/j.1420-9101.2005.00921.x
- García-Robledo, C., Kuprewicz, E. K., Staines, C. L., Erwin, T. L. and Kress, W. J.** (2016). Limited tolerance by insects to high temperatures across tropical elevational gradients and the implications of global warming for extinction. *Proc. Natl. Acad. Sci. USA* **113**, 680-685. doi:10.1073/pnas.1507681113
- Geiser, F.** (2004). Metabolic rate and body temperature reduction during hibernation and daily torpor. *Annu. Rev. Physiol.* **66**, 239-274. doi:10.1146/annurev.physiol.66.032102.115105
- Hahn, D. A. and Denlinger, D. L.** (2011). Energetics of insect diapause. *Annu. Rev. Entomol.* **56**, 103-121. doi:10.1146/annurev-ento-112408-085436
- Hodek, I. and Hodková, M.** (1988). Multiple role of temperature during insect diapause: a review. *Entomol. Exp. Appl.* **49**, 153-165. doi:10.1111/j.1570-7458.1988.tb02486.x
- Hoffmann, A. A., Anderson, A. and Hallas, R.** (2002). Opposing clines for high and low temperature resistance in *Drosophila melanogaster*. *Ecol. Lett.* **5**, 614-618. doi:10.1046/j.1461-0248.2002.00367.x
- Hoffmann, A. A., Shirriffs, J. and Scott, M.** (2005). Relative importance of plastic vs genetic factors in adaptive differentiation: geographical variation for stress resistance in *Drosophila melanogaster* from eastern Australia. *Funct. Ecol.* **19**, 222-227. doi:10.1111/j.1365-2435.2005.00959.x
- Košťál, V.** (2006). Eco-physiological phases of insect diapause. *J. Insect Physiol.* **52**, 113-127. doi:10.1016/j.jinsphys.2005.09.008
- Košťál, V. and Šimek, P.** (1995). Dynamics of cold hardiness, supercooling and cryoprotectants in diapausing and non-diapausing pupae of the cabbage root fly, *Delia radicum* L. *J. Insect Physiol.* **41**, 627-634. doi:10.1016/0022-1910(94)00124-Y
- Košťál, V., Zahradníčková, H., Šimek, P. and Zelený, J.** (2007). Multiple component system of sugars and polyols in the overwintering spruce bark beetle, *Ips typographus*. *J. Insect Physiol.* **53**, 580-586. doi:10.1016/j.jinsphys.2007.02.009
- Košťál, V., Doležal, P., Rozsypal, J., Moravcová, M., Zahradníčková, H. and Šimek, P.** (2011). Physiological and biochemical analysis of overwintering and cold tolerance in two Central European populations of the spruce bark beetle, *Ips typographus*. *J. Insect Physiol.* **57**, 1136-1146. doi:10.1016/j.jinsphys.2011.03.011
- Košťál, V., Korbelová, J., Štětina, T., Poupardin, R., Colinet, H., Zahradníčková, H., Opekarová, I., Moos, M. and Šimek, P.** (2016). Physiological basis for low-temperature survival and storage of quiescent larvae of the fruit fly *Drosophila melanogaster*. *Sci. Rep.* **6**, 32346. doi:10.1038/srep32346
- Košťál, V., Štětina, T., Poupardin, R., Korbelová, J. and Bruce, A. W.** (2017). Conceptual framework of the eco-physiological phases of insect diapause development justified by transcriptomic profiling. *Proc. Natl. Acad. Sci. USA* **114**, 8532-8537. doi:10.1073/pnas.1707281114
- Kukal, O. and Duman, J. G.** (1989). Switch in the overwintering strategy of two insect species and latitudinal differences in cold hardiness. *Can. J. Zool.* **67**, 825-827. doi:10.1139/z89-121
- Lee, R. E.** (2010). A primer on insect cold tolerance. In *Low Temperature Biology of Insect* (ed. D. L. Denlinger and R. E. J. Lee), pp. 3-34. New York: Cambridge University Press.
- Lehmann, P., Pruischer, P., Košťál, V., Moos, M., Šimek, P., Nylin, S., Agren, R., Väre, L., Wiklund, C., Wheat, C. W. et al.** (2018). Metabolome dynamics of diapause in the butterfly *Pieris napi*: distinguishing maintenance, termination and post-diapause phases. *J. Exp. Biol.* **221**, jeb169508. doi:10.1242/jeb.169508
- Li, N. G. and Averenskii, A. I.** (2007). Cold adaptation in insects of central Yakutia. *Biophysics* **52**, 436-439. doi:10.1134/S000635090704015X
- Li, S., Park, Y., Duraisingham, S., Strobel, F. H., Khan, N., Soltow, Q. A., Jones, D. P. and Pulendran, B.** (2013). Predicting network activity from high throughput metabolomics. *PLoS Comput. Biol.* **9**, e1003123. doi:10.1371/journal.pcbi.1003123
- Li, N. G., Toxopeus, J., Moos, M., Sørensen, J. G. and Sinclair, B. J.** (2020). A comparison of low temperature biology of *Pieris rapae* from Ontario, Canada, and Yakutia, Far Eastern Russia. *Comp. Biochem. Physiol. A Mol. Integr. Physiol.* **242**, 110649. doi:10.1016/j.cbpa.2020.110649
- MacMillan, H. A., Kneé, J. M., Dennis, A. B., Udaka, H., Marshall, K. E., Merritt, T. J. S. and Sinclair, B. J.** (2016). Cold acclimation wholly reorganizes the *Drosophila melanogaster* transcriptome and metabolome. *Sci. Rep.* **6**, 28999. doi:10.1038/srep28999
- Marshall, K. E. and Sinclair, B. J.** (2012). Threshold temperatures mediate the impact of reduced snow cover on overwintering freeze-tolerant caterpillars. *Naturwissenschaften* **99**, 33-41. doi:10.1007/s00114-011-0866-0
- Marshall, K. E. and Sinclair, B. J.** (2015). The relative importance of number, duration and intensity of cold stress events in determining survival and energetics of an overwintering insect. *Funct. Ecol.* **29**, 357-366. doi:10.1111/1365-2435.12328
- Meister, K., Ebbinghaus, S., Xu, Y., Duman, J. G., Devries, A., Gruebele, M., Leitner, D. M. and Havenith, M.** (2013). Long-range protein-water dynamics in hyperactive insect antifreeze proteins. *Proc. Natl. Acad. Sci. USA* **110**, 1617-1622. doi:10.1073/pnas.1214911110
- Merkey, A. B., Wong, C. K., Hoshizaki, D. K. and Gibbs, A. G.** (2011). Energetics of metamorphosis in *Drosophila melanogaster*. *J. Insect Physiol.* **57**, 1437-1445. doi:10.1016/j.jinsphys.2011.07.013
- Michaud, M. R. and Denlinger, D. L.** (2006). Oleic acid is elevated in cell membranes during rapid cold-hardening and pupal diapause in the flesh fly, *Sarcophaga crassipalpis*. *J. Insect Physiol.* **52**, 1073-1082. doi:10.1016/j.jinsphys.2006.07.005
- Michaud, M. R. and Denlinger, D. L.** (2007). Shifts in the carbohydrate, polyol, and amino acid pools during rapid cold-hardening and diapause-associated cold-hardening in flesh flies (*Sarcophaga crassipalpis*): a metabolomic comparison. *J. Comp. Physiol. B* **177**, 753-763. doi:10.1007/s00360-007-0172-5
- Michaud, M. R., Benoit, J. B., Lopez-Martinez, G., Elnitsky, M. A., Lee, R. E., Jr and Denlinger, D. L.** (2008). Metabolomics reveals unique and shared metabolic changes in response to heat shock, freezing and desiccation in the Antarctic midge, *Belgica antarctica*. *J. Insect Physiol.* **54**, 645-655. doi:10.1016/j.jinsphys.2008.01.003
- Mikucki, E. and Lockwood, B.** (2021). Local thermal environment and warming influence supercooling and drive widespread shifts in the metabolome of diapausing *Pieris rapae* butterflies. *Dryad, Dataset*. doi:10.5061/dryad.sn02v6x53
- Nguyen, A. D., Brown, M., Zitnay, J., Cahan, S. H., Gotelli, N. J., Arnett, A. and Ellison, A. M.** (2019). Trade-offs in cold resistance at the northern range edge of the common woodland ant *Aphaenogaster picea* (Formicidae). *Am. Nat.* **194**, E151-E163. doi:10.1086/705939
- Ogg, C. L., Howard, R. W. and Stanley-Samuelson, D. W.** (1991). Fatty acid composition and incorporation of arachidonic acid into phospholipids of hemocytes from the tobacco hornworm *Manduca sexta*. *Insect Biochem.* **21**, 809-814. doi:10.1016/0020-1790(91)90123-V
- Posledovich, D., Toftegaard, T., Wiklund, C., Ehrén, J. and Gotthard, K.** (2015). Latitudinal variation in diapause duration and post-winter development in two pierid butterflies in relation to phenological specialization. *Oecologia* **177**, 181-190. doi:10.1007/s00442-014-3125-1
- Preisser, E. L., Elkinton, J. S. and Abell, K.** (2008). Evolution of increased cold tolerance during range expansion of the elongate hemlock scale *Fiorinia externa* Ferris (Hemiptera: Diaspididae). *Ecol. Entomol.* **33**, 709-715. doi:10.1111/j.1365-2311.2008.01021.x

- Pullin, A. S., Bale, J. S. and Fontaine, X. L. R.** (1991). Physiological aspects of diapause and cold tolerance during overwintering in *Pieris brassicae*. *Physiol. Entomol.* **16**, 447-456. doi:10.1111/j.1365-3032.1991.tb00584.x
- Ragland, G. J. and Keep, E.** (2017). Comparative transcriptomics support evolutionary convergence of diapause responses across Insecta. *Physiol. Entomol.* **42**, 246-256. doi:10.1111/phen.12193
- Ragland, G. J., Egan, S. P., Feder, J. L., Berlocher, S. H. and Hahn, D. A.** (2011). Developmental trajectories of gene expression reveal candidates for diapause termination: a key life-history transition in the apple maggot fly *Rhagoletis pomonella*. *J. Exp. Biol.* **214**, 3948-3960. doi:10.1242/jeb.061085
- Richards, O. W.** (1940). The biology of the small white butterfly (*Pieris rapae*), with special reference to the factors controlling its abundance. *J. Anim. Ecol.* **9**, 243-288. doi:10.2307/1459
- Rochefort, S., Berthiaume, R., Hébert, C., Charest, M. and Bauce, É.** (2011). Effect of temperature and host tree on cold hardness of hemlock looper eggs along a latitudinal gradient. *J. Insect Physiol.* **57**, 751-759. doi:10.1016/j.jinsphys.2011.02.013
- Ryan, S. F., Lombaert, E., Espeset, A., Vila, R., Talavera, G., Dincă, V., Doellman, M. M., Renshaw, M. A., Eng, M. W., Hornett, E. A. et al.** (2019). Global invasion history of the agricultural pest butterfly *Pieris rapae* revealed with genomics and citizen science. *Proc. Natl. Acad. Sci. USA* **116**, 20015-20024. doi:10.1073/pnas.1907492116
- Sformo, T., Walters, K., Jeannot, K., Wowk, B., Fahy, G. M., Barnes, B. M. and Duman, J. G.** (2010). Deep supercooling, vitrification and limited survival to  $-100^{\circ}\text{C}$  in the Alaskan beetle *Cucujus clavipes puniceus* (Coleoptera: Cucujidae) larvae. *J. Exp. Biol.* **213**, 502-509. doi:10.1242/jeb.035758
- Sgolastra, F., Kemp, W. P., Buckner, J. S., Pitts-Singer, T. L., Maini, S. and Bosch, J.** (2011). The long summer: pre-wintering temperatures affect metabolic expenditure and winter survival in a solitary bee. *J. Insect Physiol.* **57**, 1651-1659. doi:10.1016/j.jinsphys.2011.08.017
- Sinclair, B. J.** (2001). Field ecology of freeze tolerance: interannual variation in cooling rates, freeze-thaw and thermal stress in the microhabitat of the alpine cockroach *Celatoblatta quinque maculata*. *Oikos* **93**, 286-293. doi:10.1034/j.1600-0706.2001.930211.x
- Sinclair, B. J.** (2015). Linking energetics and overwintering in temperate insects. *J. Therm. Biol.* **54**, 5-11. doi:10.1016/j.jtherbio.2014.07.007
- Sinclair, B. J. and Marshall, K. E.** (2018). The many roles of fats in overwintering insects. *J. Exp. Biol.* **221**, jeb161836. doi:10.1242/jeb.161836
- Sinclair, B. J., Coello Alvarado, L. E. and Ferguson, L. V.** (2015). An invitation to measure insect cold tolerance: methods, approaches, and workflow. *J. Therm. Biol.* **53**, 180-197. doi:10.1016/j.jtherbio.2015.11.003
- Sinclair, B. J., Marshall, K. E., Sewell, M. A., Levesque, D. L., Willett, C. S., Slotsbo, S., Dong, Y., Harley, C. D. G., Marshall, D. J., Helmuth, B. S. et al.** (2016). Can we predict ectotherm responses to climate change using thermal performance curves and body temperatures? *Ecol. Lett.* **19**, 1372-1385. doi:10.1111/ele.12686
- Snapp, B. D. and Heller, H. C.** (1981). Suppression of metabolism during hibernation in ground squirrels (*Citellus lateralis*). *Physiol. Zool.* **54**, 297-307. doi:10.1086/physzool.54.3.30159944
- Sobek-Swant, S., Crosthwaite, J. C., Lyons, D. B. and Sinclair, B. J.** (2012). Could phenotypic plasticity limit an invasive species? Incomplete reversibility of mid-winter deacclimation in emerald ash borer. *Biol. Invasions* **14**, 115-125. doi:10.1007/s10530-011-9988-8
- Somero, G. N.** (2010). The physiology of climate change: how potentials for acclimatization and genetic adaptation will determine 'winners' and 'losers'. *J. Exp. Biol.* **213**, 912-920. doi:10.1242/jeb.037473
- Somero, G. N., Lockwood, B. L. and Tomanek, L.** (2017). *Biochemical Adaptation: Response to Environmental Challenges from Life's Origins to the Anthropocene*, Sunderland, MA: Sinauer.
- Sømme, L.** (1982). Supercooling and winter survival in terrestrial arthropods. *Comp. Biochem. Physiol. A Physiol.* **73**, 519-543. doi:10.1016/0300-9629(82)90260-2
- Storey, J. M. and Storey, K. B.** (1986). Winter survival of the gall fly larva, *Eurosta solidaginis*: profiles of fuel reserves and cryoprotectants in a natural population. *J. Insect Physiol.* **32**, 549-556. doi:10.1016/0022-1910(86)90070-3
- Storey, K. B. and Storey, J. M.** (1988). Freeze tolerance in animals. *Physiol. Rev.* **68**, 27-84. doi:10.1152/physrev.1988.68.1.27
- Storey, K. B. and Storey, J. M.** (1991). Biochemistry of cryoprotectants. In *Insects at Low Temperature* (ed. R. E. Lee, Jr. and D. L. Denlinger), pp. 64-93. New York, London: Chapman and Hall.
- Storey, K. B. and Storey, J. M.** (2010). Metabolic rate depression: the biochemistry of mammalian hibernation. *Adv. Clin. Chem.* **52**, 77-108. doi:10.1016/S0065-2423(10)52003-1
- Storey, K. B. and Storey, J. M.** (2012). Insect cold hardness: metabolic, gene, and protein adaptation. *Can. J. Zool.* **90**, 456-475. doi:10.1139/z2012-011
- Street, T. O., Bolen, D. W. and Rose, G. D.** (2006). A molecular mechanism for osmolyte-induced protein stability. *Proc. Natl. Acad. Sci. USA* **103**, 13997-14002. doi:10.1073/pnas.0606236103
- Stuhldreher, G., Hermann, G. and Fartmann, T.** (2014). Cold-adapted species in a warming world - an explorative study on the impact of high winter temperatures on a continental butterfly. *Entomol. Exp. Appl.* **151**, 270-279. doi:10.1111/eea.12193
- Teets, N. M. and Hahn, D. A.** (2018). Genetic variation in the shape of cold-survival curves in a single fly population suggests potential for selection from climate variability. *J. Evol. Biol.* **31**, 543-555. doi:10.1111/jeb.13244
- Toxopeus, J., Košťál, V. and Sinclair, B. J.** (2019). Evidence for non-colligative function of small cryoprotectants in a freeze-tolerant insect. *Proc. R. Soc. B Biol. Sci.* **286**, 20190050. doi:10.1098/rspb.2019.0050
- Vallières, R., Rochefort, S., Berthiaume, R., Hébert, C. and Bauce, É.** (2015). Effect of simulated fall heat waves on cold hardness and winter survival of hemlock looper, *Lambdina fuscicollis* (Lepidoptera: Geometridae). *J. Insect Physiol.* **73**, 60-69. doi:10.1016/j.jinsphys.2014.12.001
- Vrba, P., Dolek, M., Nedvěd, O., Zahradníčková, H., Cerrato, C. and Konvička, M.** (2014). Overwintering of the boreal butterfly *Colias palaeno* in central Europe. *Cryoletters* **35**, 247-254.
- Walters, K. R., Serrianni, A. S., Voituron, Y., Sformo, T., Barnes, B. M. and Duman, J. G.** (2011). A thermal hysteresis-producing xylomannan glycolipid antifreeze associated with cold tolerance is found in diverse taxa. *J. Comp. Physiol. B* **181**, 631-640. doi:10.1007/s00360-011-0552-8
- Wang, H.-S., Zhou, C.-S., Guo, W. and Kang, L.** (2006). Thermoperiodic acclimations enhance cold hardness of the eggs of the migratory locust. *Cryobiology* **53**, 206-217. doi:10.1016/j.cryobiol.2006.06.003
- Williams, C. M., Marshall, K. E., MacMillan, H. A., Dzurisin, J. D. K., Hellmann, J. J. and Sinclair, B. J.** (2012). Thermal variability increases the impact of autumnal warming and drives metabolic depression in an overwintering butterfly. *PLoS ONE* **7**, e34470. doi:10.1371/journal.pone.0034470
- Williams, C. M., Nicolai, A., Ferguson, L. V., Bernards, M. A., Hellmann, J. J. and Sinclair, B. J.** (2014a). Cold hardness and deacclimation of overwintering *Papilio zelicaon* pupae. *Comp. Biochem. Physiol. A Mol. Integr. Physiol.* **178**, 51-58. doi:10.1016/j.cbpa.2014.08.002
- Williams, C. M., Watanabe, M., Guarracino, M. R., Ferraro, M. B., Edison, A. S., Morgan, T. J., Boroujerdi, A. F. B. and Hahn, D. A.** (2014b). Cold adaptation shapes the robustness of metabolic networks in *Drosophila melanogaster*. *Evolution* **68**, 3505-3523. doi:10.1111/evo.12541
- Wu, P., Peters, J. M. and Harris, R. A.** (2001). Adaptive increase in pyruvate dehydrogenase kinase 4 during starvation is mediated by peroxisome proliferator-activated receptor alpha. *Biochem. Biophys. Res. Commun.* **287**, 391-396.
- Yancey, P. H., Clark, M. E., Hand, S. C., Bowlus, R. D. and Somero, G. N.** (1982). Living with water stress: evolution of osmolyte systems. *Science* **217**, 1214-1222. doi:10.1126/science.7112124
